# Supplementary material
Source: PubMed Central journal article supplement (PMC8918004)
Supplement: NIHMS1761794-supplement-2.pdf [file NIHMS1761794-supplement-2.pdf]

*Supplemental Information*

**Table S1.** Comparison of baseline characteristics of twins who were and were not examined at Visit 2

|                                                        | Twins who were not examined at Visit 2 (N=291) | Twins who were examined at visit 2 (N=275) | p-value |
|--------------------------------------------------------|------------------------------------------------|--------------------------------------------|---------|
| <b>Sociodemographic Factors</b>                        |                                                |                                            |         |
| Age, yrs, mean (SD)                                    | 55.4 (3.3)                                     | 55.6 (3.0)                                 | 0.54    |
| Non-white                                              | 4.5                                            | 3.3                                        | 0.47    |
| Married                                                | 74.2                                           | 77.8                                       | 0.32    |
| Years of education, mean (SD)                          | 14.0 (2.2)                                     | 14.2 (2.2)                                 | 0.32    |
| Employed full time                                     | 69.8                                           | 77.0                                       | 0.05    |
| Service in Southeast Asia                              | 47.4                                           | 44.4                                       | 0.47    |
| <b>Lifestyle Factors</b>                               |                                                |                                            |         |
| Current smoker                                         | 29.2                                           | 21.1                                       | 0.03    |
| Physical Activity (Baecke Score), mean (SD)            | 7.0 (1.9)                                      | 7.5 (1.7)                                  | <0.01   |
| Number of alcoholic drinks in typical week, mean (SD)  | 5.0 (10.1)                                     | 5.1 (9.2)                                  | 0.90    |
| <b>Cardiovascular Risk Factors and Medical History</b> |                                                |                                            |         |
| History diabetes                                       | 15.1                                           | 8.4                                        | 0.01    |
| History of hypertension                                | 40.8                                           | 35.3                                       | 0.17    |
| History of hyperlipidemia                              | 47.9                                           | 36.5                                       | 0.01    |
| History of coronary heart disease                      | 15.1                                           | 9.1                                        | 0.03    |
| BMI, mean (SD)                                         | 29.8 (5.8)                                     | 29.5 (4.1)                                 | 0.45    |
| Systolic blood pressure, mm Hg, mean (SD)              | 131 (16)                                       | 129 (16)                                   | 0.17    |
| Diastolic blood pressure, mm Hg, mean (SD)             | 81 (10)                                        | 81 (11)                                    | 0.34    |
| <b>Psychiatric Diagnoses (Lifetime)</b>                |                                                |                                            |         |
| PTSD                                                   | 15.8                                           | 12.7                                       | 0.30    |
| Major Depression                                       | 29.6                                           | 24.0                                       | 0.14    |
| Alcohol Abuse (with or without dependence)             | 50.9                                           | 45.1                                       | 0.17    |
| Drug Abuse (with or without dependence)                | 25.8                                           | 24.0                                       | 0.63    |
| <b>Current Medications</b>                             |                                                |                                            |         |
| Aspirin                                                | 29.2                                           | 23.3                                       | 0.11    |
| Statins                                                | 28.9                                           | 22.9                                       | 0.11    |
| Beta-blockers                                          | 10.3                                           | 5.8                                        | 0.05    |
| ACE Inhibitors                                         | 20.3                                           | 11.6                                       | <0.01   |
| Antidepressants                                        | 19.2                                           | 11.6                                       | 0.01    |
| <b>Imaging Data</b>                                    |                                                |                                            |         |
| Abnormal perfusion, > 10% percent myocardium           | 11.8                                           | 7.9                                        | 0.15    |
| Myocardial Blood Flow Quantitation, mean (SD)          |                                                |                                            |         |
| Stress MBF, mL/min/gm                                  | 1.58 (0.5)                                     | 1.58 (0.4)                                 | 0.88    |
| Rest MBF, mL/min/gm                                    | 0.68 (0.1)                                     | 0.66 (0.2)                                 | 0.31    |
| MFR, mean ratio                                        | 2.4 (0.9)                                      | 2.5 (0.7)                                  | 0.37    |

All data are percentages unless otherwise indicated.

Abbreviations: PTSD: Posttraumatic Stress Disorder; SD: standard deviation; BMI: body mass index; ACE: angiotensin converting enzyme.
